# Supplementary material for: Total vs. Partial Acid Digestion Methods for Trace Element Analysis in Archaeological Sediments
Source: MDPI journal article supplement (doi:10.3390/min12060685), 2022-05-29
Supplement: s1 [file s1]

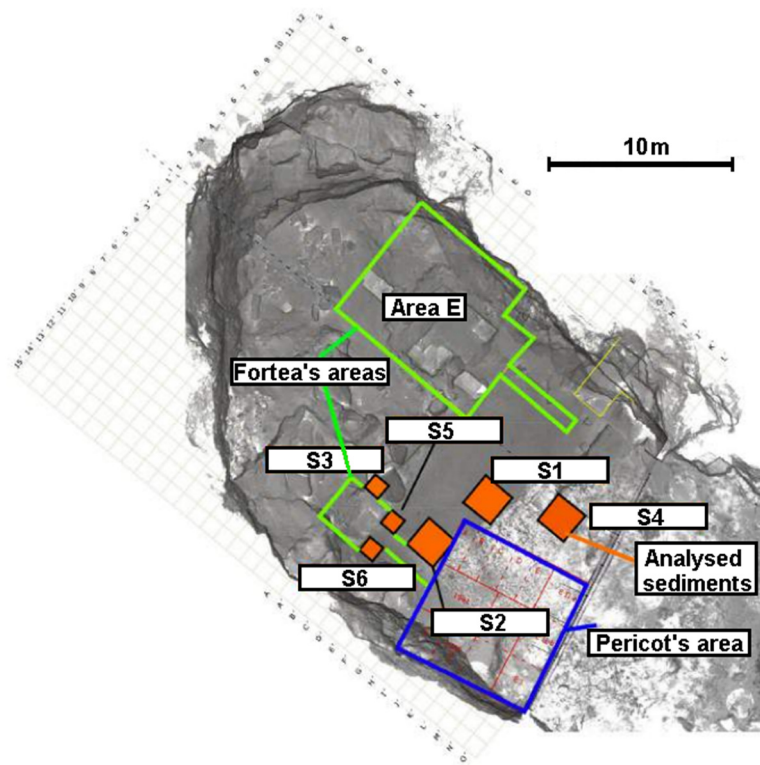

**Figure S1.** Cueva de la Cocina map (modified from García-Puchol et al., 2018. [25]).

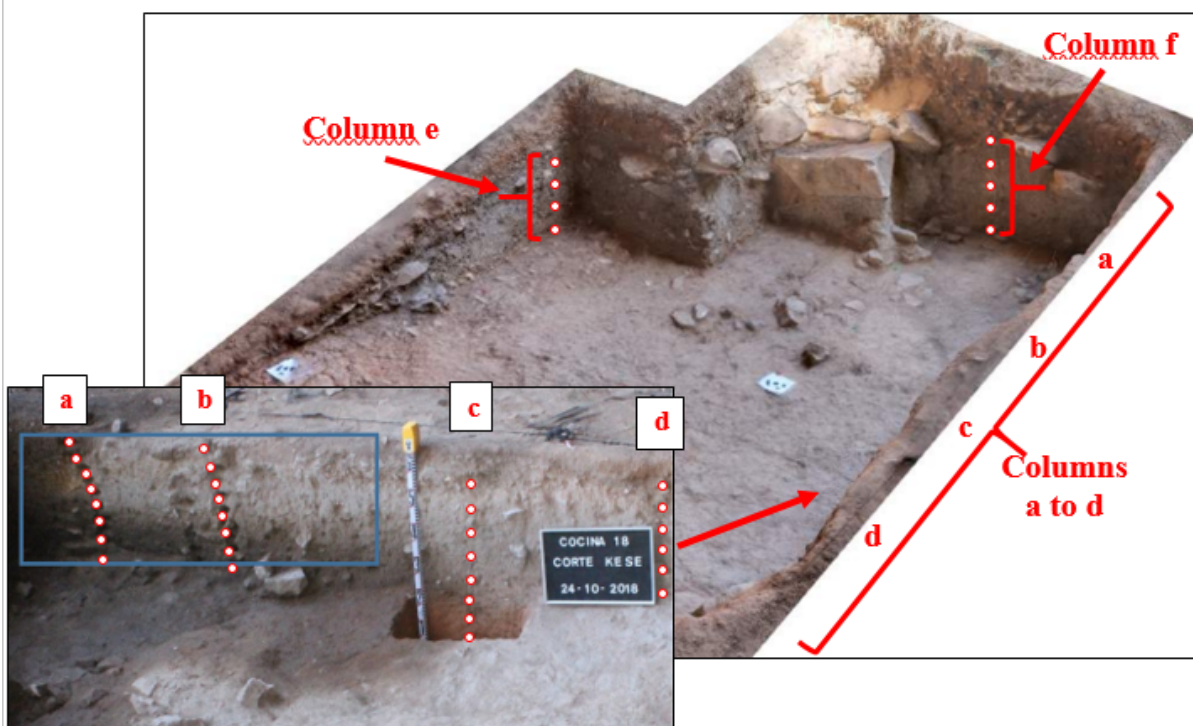

**Figure S2.** 3D model of area S4 and localisation of sampling points (modified from García-Puchol et al., 2018. [25] and Gallelo et al., 2021. [14]).

**Table S1.** Major elements, Zr and soil organic matter (SOM) amounts, and pH.

| Sample | Al    | Si    | P    | K    | Ca    | Ti   | Fe   | Zr  | SOM | pH  | Sample | Al   | Si    | P    | K    | Ca    | Ti   | Fe   | Zr  | SOM | pH  |
|--------|-------|-------|------|------|-------|------|------|-----|-----|-----|--------|------|-------|------|------|-------|------|------|-----|-----|-----|
| S4a1   | 4.11  | 13.82 | 0.34 | 0.70 | 28.83 | 0.16 | 1.66 | 113 | 3.4 | 8.1 | S4c5   | 4.77 | 16.38 | 0.18 | 1.00 | 23.15 | 0.20 | 2.09 | 163 | 1.9 | 8.0 |
| S4a2   | 4.30  | 13.12 | 0.34 | 0.63 | 27.90 | 0.15 | 1.52 | 111 | 2.9 | 8.2 | S4c6   | 4.20 | 14.90 | 0.31 | 0.88 | 28.12 | 0.18 | 1.72 | 134 | 2.1 | 7.9 |
| S4a3   | 2.60  | 13.94 | 0.53 | 0.61 | 27.63 | 0.13 | 1.40 | 103 | 3.0 | 8.2 | S4c7   | 4.96 | 16.71 | 0.28 | 1.05 | 28.33 | 0.18 | 1.81 | 137 | 1.7 | 8.1 |
| S4a4   | 3.43  | 15.88 | 0.65 | 0.66 | 28.41 | 0.14 | 1.38 | 111 | 2.9 | 8.2 | S4c8   | 3.27 | 15.28 | 0.29 | 0.96 | 27.54 | 0.15 | 1.70 | 128 | 1.3 | 8.2 |
| S4a5   | 1.69  | 18.15 | 0.83 | 0.76 | 26.43 | 0.15 | 1.40 | 105 | 2.7 | 8.2 | S4d1   | 3.98 | 16.16 | 0.19 | 0.96 | 25.67 | 0.19 | 1.89 | 141 | 2.5 | 8.1 |
| S4a6   | 3.65  | 23.35 | 0.99 | 1.00 | 20.34 | 0.16 | 1.59 | 139 | 2.3 | 8.2 | S4d2   | 3.66 | 17.02 | 0.18 | 1.04 | 27.31 | 0.18 | 1.88 | 160 | 2.3 | 8.1 |
| S4a7   | 2.77  | 24.67 | 0.86 | 1.04 | 19.24 | 0.18 | 1.68 | 126 | 2.4 | 8.2 | S4d3   | 3.39 | 16.18 | 0.20 | 1.03 | 27.61 | 0.17 | 1.83 | 150 | 2.1 | 8.1 |
| S4a8   | 4.79  | 26.85 | 0.76 | 1.14 | 16.82 | 0.22 | 1.99 | 162 | 3.1 | 8.2 | S4d4   | 2.96 | 15.84 | 0.17 | 0.96 | 26.33 | 0.17 | 1.81 | 153 | 1.7 | 8.2 |
| S4b1   | 3.88  | 13.81 | 0.25 | 0.67 | 27.65 | 0.15 | 1.71 | 118 | 3.2 | 8.3 | S4d5   | 4.07 | 16.57 | 0.24 | 1.07 | 25.70 | 0.16 | 1.82 | 139 | 1.5 | 8.2 |
| S4b2   | 3.65  | 14.76 | 0.23 | 0.75 | 27.23 | 0.16 | 1.69 | 149 | 2.9 | 8.2 | S4d6   | 4.18 | 17.61 | 0.28 | 1.23 | 28.13 | 0.17 | 1.76 | 131 | 1.1 | 8.2 |
| S4b3   | 3.89  | 16.19 | 0.22 | 0.79 | 28.09 | 0.17 | 1.72 | 136 | 2.5 | 8.3 | S4e1   | 4.25 | 23.85 | 0.20 | 1.24 | 18.67 | 0.28 | 2.72 | 189 | 1.4 | 8.1 |
| S4b4   | 2.59  | 13.31 | 0.28 | 0.66 | 28.31 | 0.16 | 1.55 | 103 | 1.7 | 8.2 | S4e2   | 4.03 | 22.57 | 0.26 | 1.17 | 20.46 | 0.26 | 2.47 | 188 | 1.9 | 8.1 |
| S4b5   | 4.22  | 13.87 | 0.35 | 0.69 | 29.44 | 0.16 | 1.46 | 114 | 1.7 | 8.3 | S4e3   | 3.47 | 22.20 | 0.42 | 1.10 | 21.25 | 0.24 | 2.30 | 187 | 2.9 | 8.1 |
| S4b6   | 3.88  | 13.29 | 0.37 | 0.64 | 31.07 | 0.14 | 1.43 | 110 | 1.7 | 8.2 | S4e4   | 3.33 | 22.23 | 0.42 | 1.06 | 20.24 | 0.24 | 2.23 | 166 | 3.5 | 8.0 |
| S4b7   | 3.21  | 14.61 | 0.40 | 0.67 | 30.18 | 0.14 | 1.37 | 100 | 1.8 | 8.0 | S4f1   | 4.20 | 23.01 | 0.35 | 1.15 | 18.88 | 0.26 | 2.55 | 183 | 1.9 | 8.2 |
| S4b8   | 3.79  | 25.34 | 0.22 | 1.16 | 17.19 | 0.28 | 2.55 | 177 | 4.4 | 7.7 | S4f2   | 3.20 | 21.24 | 0.51 | 1.04 | 19.23 | 0.25 | 2.35 | 186 | 2.4 | 8.3 |
| S4c1   | 10.68 | 27.77 | 0.02 | 1.58 | 9.26  | 0.35 | 3.18 | 230 | 0.3 | 8.2 | S4f3   | 2.95 | 21.82 | 0.61 | 0.95 | 19.11 | 0.22 | 2.12 | 178 | 2.9 | 7.9 |
| S4c2   | 10.19 | 26.40 | 0.09 | 1.50 | 14.10 | 0.28 | 3.00 | 185 | 0.6 | 8.2 | S4f4   | 2.68 | 22.60 | 0.57 | 0.94 | 20.04 | 0.24 | 2.12 | 162 | 3.6 | 7.8 |
| S4c3   | 5.51  | 18.39 | 0.10 | 1.12 | 20.59 | 0.23 | 2.34 | 179 | 1.3 | 8.3 | S4f5   | 3.51 | 24.38 | 0.42 | 1.11 | 17.82 | 0.27 | 2.39 | 157 | 4.4 | 7.9 |
| S4c4   | 4.55  | 15.84 | 0.18 | 0.87 | 25.93 | 0.18 | 1.84 | 126 | 1.9 | 8.2 |        |      |       |      |      |       |      |      |     |     |     |

Note: Elemental and SOM concentrations are expressed as mass percentage, except for Zr which is expressed as mg kg<sup>-1</sup>.

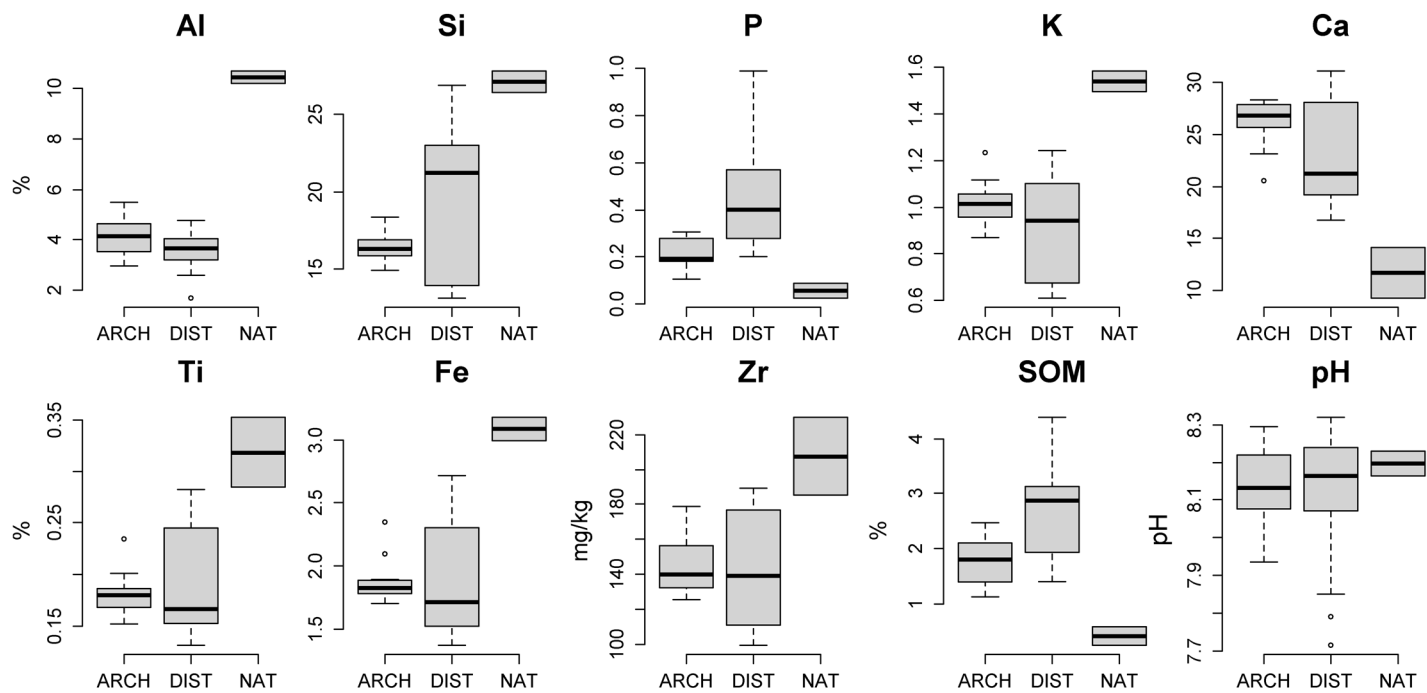

**Figure S3.** Boxplots for pXRF results, SOM amount and pH.

**Table S2.** Trace elements concentrations for *acqua regia* digestion expressed as mg/kg.

| Sample   | Ba   | Bi    | Cd    | Co   | Cr   | Cu   | Li   | Mn  | Mo   | Ni   | Pb   | Sr  | Tl    | V    | Zn   |
|----------|------|-------|-------|------|------|------|------|-----|------|------|------|-----|-------|------|------|
| S4a1     | 109  | 0.076 | 0.329 | 7.24 | 22.3 | 55.7 | 9.74 | 300 | 1.75 | 26.5 | 9.02 | 195 | 0.244 | 29.8 | 55.6 |
| S4a2     | 97.9 | 0.014 | 0.308 | 6.76 | 19.7 | 47.0 | 9.04 | 297 | 1.20 | 24.6 | 7.40 | 190 | 0.193 | 21.2 | 50.9 |
| S4a3     | 130  | 0.059 | 0.443 | 6.23 | 19.3 | 67.0 | 9.03 | 358 | 1.76 | 26.5 | 7.66 | 192 | 0.243 | 24.1 | 78.0 |
| S4a4     | 143  | 0.037 | 0.502 | 5.78 | 19.1 | 74.0 | 8.50 | 376 | 1.74 | 27.4 | 7.25 | 184 | 0.233 | 23.6 | 97.3 |
| S4a5     | 205  | 0.057 | 0.705 | 7.17 | 20.9 | 84.5 | 9.35 | 560 | 2.83 | 29.2 | 8.20 | 196 | 0.279 | 27.8 | 161  |
| S4a6     | 291  | 0.068 | 0.781 | 8.18 | 20.4 | 63.7 | 7.99 | 784 | 2.52 | 27.6 | 8.28 | 182 | 0.250 | 24.2 | 228  |
| S4a7     | 296  | 0.096 | 0.820 | 8.47 | 21.0 | 62.7 | 9.11 | 812 | 2.49 | 27.3 | 10.6 | 170 | 0.289 | 25.0 | 250  |
| S4a8     | 245  | 0.122 | 0.930 | 8.78 | 24.7 | 58.2 | 10.9 | 839 | 2.28 | 27.5 | 13.7 | 153 | 0.292 | 29.0 | 252  |
| S4b1     | 72.0 | 0.040 | 0.216 | 8.30 | 19.6 | 41.2 | 7.37 | 284 | 1.26 | 27.8 | 8.68 | 171 | 0.180 | 32.3 | 44.3 |
| S4b2     | 76.8 | 0.046 | 0.234 | 9.27 | 21.3 | 46.6 | 8.07 | 336 | 1.18 | 30.7 | 9.35 | 181 | 0.187 | 33.6 | 44.1 |
| S4b3     | 72.5 | 0.096 | 0.216 | 8.50 | 21.3 | 46.5 | 8.23 | 319 | 1.84 | 28.2 | 9.22 | 160 | 0.182 | 36.7 | 39.1 |
| S4b4     | 79.6 | 0.118 | 0.234 | 7.41 | 21.2 | 44.8 | 7.89 | 324 | 1.44 | 25.8 | 9.41 | 178 | 0.207 | 38.0 | 43.6 |
| S4b5     | 82.9 | 0.095 | 0.250 | 6.49 | 19.7 | 43.3 | 7.48 | 310 | 1.25 | 23.6 | 8.50 | 174 | 0.197 | 31.5 | 44.7 |
| S4b6     | 94.4 | 0.090 | 0.284 | 6.53 | 21.2 | 43.9 | 7.89 | 372 | 1.20 | 24.3 | 8.45 | 187 | 0.205 | 29.6 | 50.7 |
| S4b7     | 113  | 0.094 | 0.402 | 6.79 | 21.5 | 55.2 | 7.48 | 434 | 1.55 | 24.8 | 8.21 | 179 | 0.200 | 31.5 | 75.5 |
| S4b8     | 90.4 | 0.191 | 0.417 | 7.87 | 28.2 | 29.1 | 9.73 | 505 | 3.05 | 26.2 | 27.7 | 127 | 0.243 | 46.3 | 90.7 |
| S4c1     | 48.4 | 0.235 | 0.198 | 10.9 | 31.7 | 11.6 | 11.3 | 408 | 2.81 | 26.6 | 14.3 | 65  | 0.236 | 59.3 | 35.4 |
| S4c2     | 52.3 | 0.159 | 0.201 | 10.5 | 26.9 | 13.7 | 8.63 | 404 | 1.36 | 25.3 | 13.6 | 85  | 0.192 | 51.9 | 31.4 |
| S4c3     | 61.9 | 0.115 | 0.219 | 9.04 | 24.7 | 20.1 | 8.18 | 398 | 2.26 | 25.8 | 12.2 | 125 | 0.201 | 46.2 | 38.6 |
| S4c4     | 74.0 | 0.121 | 0.230 | 8.57 | 23.7 | 25.6 | 8.12 | 369 | 1.62 | 27.3 | 11.0 | 171 | 0.195 | 41.4 | 50.4 |
| S4c5     | 66.4 | 0.068 | 0.210 | 8.99 | 23.9 | 22.2 | 7.87 | 366 | 1.36 | 26.0 | 11.5 | 146 | 0.201 | 44.2 | 43.4 |
| S4c6     | 84.4 | 0.085 | 0.241 | 8.75 | 22.7 | 29.5 | 7.74 | 394 | 1.61 | 26.8 | 10.2 | 183 | 0.211 | 41.2 | 47.1 |
| S4c7     | 79.7 | 0.094 | 0.267 | 6.81 | 21.9 | 30.0 | 7.09 | 393 | 1.39 | 23.7 | 10.1 | 195 | 0.197 | 34.9 | 50.1 |
| S4c8     | 91.7 | 0.097 | 0.336 | 5.56 | 22.0 | 26.6 | 7.10 | 430 | 1.59 | 22.6 | 10.1 | 204 | 0.216 | 33.4 | 62.4 |
| S4d1     | 83.3 | 0.182 | 0.261 | 8.07 | 23.0 | 25.1 | 7.62 | 443 | 2.16 | 26.3 | 10.4 | 176 | 0.196 | 42.2 | 48.4 |
| S4d2     | 79.3 | 0.165 | 0.224 | 7.66 | 20.3 | 22.9 | 7.52 | 373 | 2.03 | 25.0 | 9.70 | 172 | 0.180 | 35.1 | 45.4 |
| S4d3     | 82.3 | 0.171 | 0.249 | 8.39 | 21.2 | 26.6 | 7.82 | 381 | 1.97 | 25.5 | 9.98 | 184 | 0.202 | 35.0 | 48.1 |
| S4d4     | 78.2 | 0.169 | 0.239 | 9.06 | 20.5 | 28.0 | 7.51 | 385 | 1.81 | 23.2 | 9.56 | 187 | 0.202 | 36.3 | 48.4 |
| S4d5     | 79.3 | 0.180 | 0.246 | 6.68 | 20.9 | 26.2 | 7.80 | 435 | 1.77 | 21.5 | 10.1 | 190 | 0.207 | 39.2 | 46.4 |
| S4d6     | 85.9 | 0.214 | 0.303 | 5.29 | 20.2 | 21.7 | 9.21 | 390 | 2.45 | 22.3 | 10.1 | 227 | 0.225 | 39.2 | 61.4 |
| S4e1     | 77.8 | 0.270 | 0.312 | 9.86 | 27.3 | 28.2 | 10.9 | 384 | 3.23 | 27.9 | 13.8 | 139 | 0.277 | 56.3 | 52.4 |
| S4e2     | 90.8 | 0.230 | 0.355 | 9.40 | 25.9 | 35.7 | 9.77 | 418 | 2.40 | 27.8 | 13.4 | 155 | 0.251 | 45.0 | 65.0 |
| S4e3     | 106  | 0.106 | 0.469 | 8.57 | 22.9 | 44.4 | 8.13 | 497 | 1.64 | 26.5 | 12.6 | 165 | 0.243 | 31.7 | 97.0 |
| S4e4     | 115  | 0.225 | 0.568 | 8.86 | 26.0 | 53.0 | 9.80 | 636 | 2.45 | 26.8 | 13.9 | 162 | 0.275 | 43.9 | 133  |
| S4f1     | 94   | 0.176 | 0.421 | 8.66 | 24.4 | 40.2 | 8.59 | 418 | 2.28 | 26.7 | 12.6 | 142 | 0.271 | 39.3 | 71.2 |
| S4f2     | 113  | 0.106 | 0.569 | 8.83 | 22.8 | 54.2 | 7.79 | 503 | 5.16 | 28.6 | 12.2 | 149 | 0.282 | 32.5 | 113  |
| S4f3     | 140  | 0.255 | 0.785 | 9.13 | 24.2 | 66.5 | 8.02 | 664 | 2.13 | 30.6 | 13.3 | 156 | 0.312 | 33.6 | 169  |
| S4f4     | 144  | 0.139 | 0.892 | 9.72 | 26.5 | 72.2 | 8.82 | 808 | 2.10 | 31.5 | 14.4 | 160 | 0.320 | 35.4 | 212  |
| S4f5     | 110  | 0.123 | 0.744 | 9.05 | 26.8 | 58.7 | 8.27 | 769 | 1.88 | 27.7 | 16.9 | 139 | 0.283 | 29.3 | 175  |
| Mean     | 109  | 0.13  | 0.4   | 8.1  | 23   | 42   | 8.5  | 458 | 2.0  | 26   | 11   | 167 | 0.23  | 36   | 86   |
| St. Dev. | 58   | 0.06  | 0.2   | 1.3  | 3    | 18   | 1.1  | 157 | 0.7  | 2    | 4    | 31  | 0.04  | 9    | 63   |

**Table S3.** Trace elements concentrations for total digestion expressed as mg/kg.

| Sample          | Ba  | Bi    | Cd    | Co   | Cr   | Cu   | Li   | Mn  | Mo   | Ni   | Pb   | Sr  | Tl    | V    | Zn   |
|-----------------|-----|-------|-------|------|------|------|------|-----|------|------|------|-----|-------|------|------|
| S4a1            | 124 | 0.130 | 0.273 | 4.84 | 20.3 | 37.6 | 11.2 | 191 | 2.44 | 16.1 | 6.20 | 149 | 0.317 | 24.7 | 28.9 |
| S4a2            | 105 | 0.081 | 0.250 | 4.92 | 20.5 | 37.9 | 10.9 | 194 | 1.78 | 16.3 | 5.97 | 139 | 0.315 | 24.7 | 28.7 |
| S4a3            | 232 | 0.104 | 0.498 | 5.29 | 24.2 | 53.4 | 13.6 | 301 | 2.03 | 22.2 | 7.62 | 197 | 0.354 | 28.9 | 48.7 |
| S4a4            | 237 | 0.094 | 0.879 | 4.66 | 23.1 | 57.2 | 12.7 | 304 | 2.08 | 21.9 | 7.03 | 191 | 0.336 | 26.4 | 54.7 |
| S4a5            | 288 | 0.082 | 0.772 | 5.54 | 24.1 | 65.2 | 12.2 | 440 | 2.89 | 23.4 | 7.41 | 195 | 0.358 | 27.4 | 106  |
| S4a6            | 386 | 0.092 | 0.896 | 6.70 | 24.4 | 53.0 | 10.8 | 666 | 3.05 | 23.5 | 7.61 | 190 | 0.347 | 27.6 | 171  |
| S4a7            | 376 | 0.095 | 0.864 | 6.82 | 24.9 | 54.3 | 11.6 | 690 | 3.01 | 23.8 | 7.66 | 192 | 0.342 | 28.7 | 175  |
| S4a8            | 337 | 0.151 | 0.975 | 7.69 | 32.9 | 49.5 | 19.9 | 780 | 2.80 | 25.5 | 13.0 | 166 | 0.466 | 37.4 | 197  |
| S4b1            | 172 | 0.295 | 0.308 | 6.74 | 30.6 | 32.8 | 20.4 | 243 | 2.57 | 24.8 | 10.0 | 177 | 0.454 | 40.6 | 29.7 |
| S4b2            | 166 | 0.180 | 0.283 | 6.80 | 29.2 | 34.7 | 20.1 | 253 | 2.08 | 24.5 | 9.71 | 169 | 0.428 | 39.0 | 26.5 |
| S4b3            | 171 | 0.159 | 0.284 | 6.38 | 31.9 | 34.5 | 19.4 | 243 | 1.67 | 23.8 | 9.91 | 165 | 0.418 | 38.8 | 27.1 |
| S4b4            | 107 | 0.096 | 0.209 | 5.05 | 20.3 | 29.8 | 12.8 | 209 | 1.73 | 15.6 | 6.10 | 143 | 0.292 | 29.0 | 25.3 |
| S4b5            | 191 | 0.152 | 0.306 | 5.37 | 28.3 | 33.3 | 18.3 | 254 | 1.40 | 21.0 | 9.22 | 174 | 0.399 | 35.2 | 31.9 |
| S4b6            | 186 | 0.132 | 0.340 | 5.07 | 27.4 | 33.4 | 16.7 | 272 | 1.35 | 20.8 | 8.64 | 162 | 0.378 | 33.1 | 33.7 |
| S4b7            | 206 | 0.118 | 0.452 | 5.30 | 26.9 | 38.5 | 16.2 | 326 | 1.50 | 20.4 | 8.30 | 168 | 0.363 | 32.0 | 50.4 |
| S4b8            | 222 | 0.202 | 0.507 | 6.84 | 42.4 | 22.0 | 28.1 | 419 | 3.64 | 24.5 | 24.6 | 137 | 0.572 | 53.7 | 68.8 |
| S4c1            | 203 | 0.250 | 0.313 | 9.16 | 51.3 | 11.7 | 36.4 | 372 | 4.58 | 28.8 | 16.6 | 91  | 0.667 | 73.8 | 38.4 |
| S4c2            | 236 | 0.267 | 0.333 | 9.62 | 53.1 | 14.5 | 33.9 | 366 | 4.55 | 29.3 | 18.0 | 109 | 0.723 | 75.2 | 40.1 |
| S4c3            | 247 | 0.214 | 0.350 | 8.12 | 42.7 | 18.8 | 24.3 | 334 | 4.62 | 27.4 | 16.7 | 124 | 0.663 | 60.7 | 39.3 |
| S4c4            | 210 | 0.147 | 0.289 | 6.34 | 31.5 | 18.6 | 18.6 | 266 | 1.88 | 22.6 | 12.5 | 152 | 0.481 | 44.5 | 29.7 |
| S4c5            | 206 | 0.164 | 0.288 | 7.70 | 36.7 | 19.0 | 23.0 | 305 | 2.32 | 24.6 | 13.5 | 136 | 0.545 | 52.5 | 25.5 |
| S4c6            | 118 | 0.099 | 0.217 | 6.00 | 22.1 | 21.0 | 15.0 | 264 | 1.86 | 16.7 | 6.97 | 164 | 0.320 | 32.9 | 27.7 |
| S4c7            | 200 | 0.145 | 0.332 | 5.72 | 33.3 | 25.2 | 18.6 | 306 | 1.54 | 21.8 | 12.2 | 171 | 0.509 | 43.0 | 39.3 |
| S4c8            | 241 | 0.175 | 0.493 | 4.95 | 34.4 | 22.9 | 19.1 | 349 | 1.72 | 21.2 | 12.3 | 183 | 0.519 | 43.5 | 43.0 |
| S4d1            | 237 | 0.142 | 0.348 | 7.10 | 34.4 | 20.9 | 19.9 | 590 | 1.97 | 25.1 | 12.5 | 166 | 0.542 | 47.4 | 35.1 |
| S4d2            | 222 | 0.145 | 0.328 | 6.72 | 33.2 | 20.7 | 18.4 | 312 | 1.76 | 24.5 | 12.8 | 149 | 0.501 | 43.8 | 36.0 |
| S4d3            | 234 | 0.151 | 0.337 | 7.70 | 34.5 | 23.3 | 19.3 | 337 | 1.70 | 26.1 | 13.3 | 155 | 0.521 | 44.7 | 39.2 |
| S4d4            | 217 | 0.209 | 0.317 | 9.53 | 40.6 | 29.7 | 25.1 | 406 | 1.57 | 28.4 | 15.1 | 159 | 0.625 | 53.6 | 49.7 |
| S4d5            | 192 | 0.191 | 0.306 | 6.79 | 38.8 | 26.5 | 22.6 | 427 | 1.60 | 25.0 | 14.7 | 156 | 0.590 | 52.6 | 36.8 |
| S4d6            | 182 | 0.195 | 0.327 | 5.28 | 37.1 | 20.8 | 23.5 | 366 | 1.94 | 22.7 | 12.9 | 164 | 0.578 | 48.5 | 36.8 |
| S4e1            | 242 | 0.234 | 0.403 | 9.82 | 58.5 | 28.0 | 39.1 | 396 | 3.95 | 35.9 | 17.7 | 142 | 0.735 | 72.3 | 50.7 |
| S4e2            | 150 | 0.124 | 0.321 | 7.50 | 31.9 | 28.4 | 22.2 | 313 | 2.24 | 21.3 | 9.92 | 140 | 0.416 | 40.4 | 50.6 |
| S4e3            | 243 | 0.179 | 0.522 | 8.74 | 47.6 | 44.4 | 33.2 | 514 | 2.64 | 30.6 | 16.0 | 158 | 0.641 | 58.0 | 87.3 |
| S4e4            | 219 | 0.184 | 0.581 | 8.23 | 34.3 | 44.5 | 34.3 | 578 | 2.52 | 24.9 | 10.9 | 169 | 0.436 | 50.4 | 140  |
| S4f1            | 226 | 0.166 | 0.505 | 9.08 | 38.6 | 39.0 | 40.5 | 444 | 3.13 | 27.7 | 12.4 | 168 | 0.528 | 62.7 | 101  |
| S4f2            | 229 | 0.140 | 0.636 | 8.83 | 39.8 | 50.5 | 36.4 | 529 | 2.78 | 27.8 | 11.8 | 170 | 0.518 | 56.6 | 136  |
| S4f3            | 206 | 0.123 | 0.568 | 7.90 | 35.7 | 45.3 | 32.7 | 473 | 2.47 | 24.8 | 10.7 | 152 | 0.479 | 50.6 | 121  |
| S4f4            | 209 | 0.131 | 0.848 | 8.76 | 33.2 | 58.5 | 33.5 | 723 | 2.33 | 27.3 | 12.0 | 172 | 0.495 | 45.9 | 226  |
| S4f5            | 220 | 0.151 | 0.792 | 8.70 | 37.2 | 53.5 | 34.8 | 723 | 2.42 | 26.9 | 15.2 | 157 | 0.505 | 48.4 | 209  |
| <i>Mean</i>     | 215 | 0.16  | 0.5   | 7.0  | 34   | 35   | 23   | 397 | 2.4  | 24   | 12   | 160 | 0.48  | 44   | 70   |
| <i>St. Dev.</i> | 60  | 0.05  | 0.2   | 1.6  | 9    | 14   | 9    | 159 | 0.9  | 4    | 4    | 22  | 0.12  | 14   | 58   |

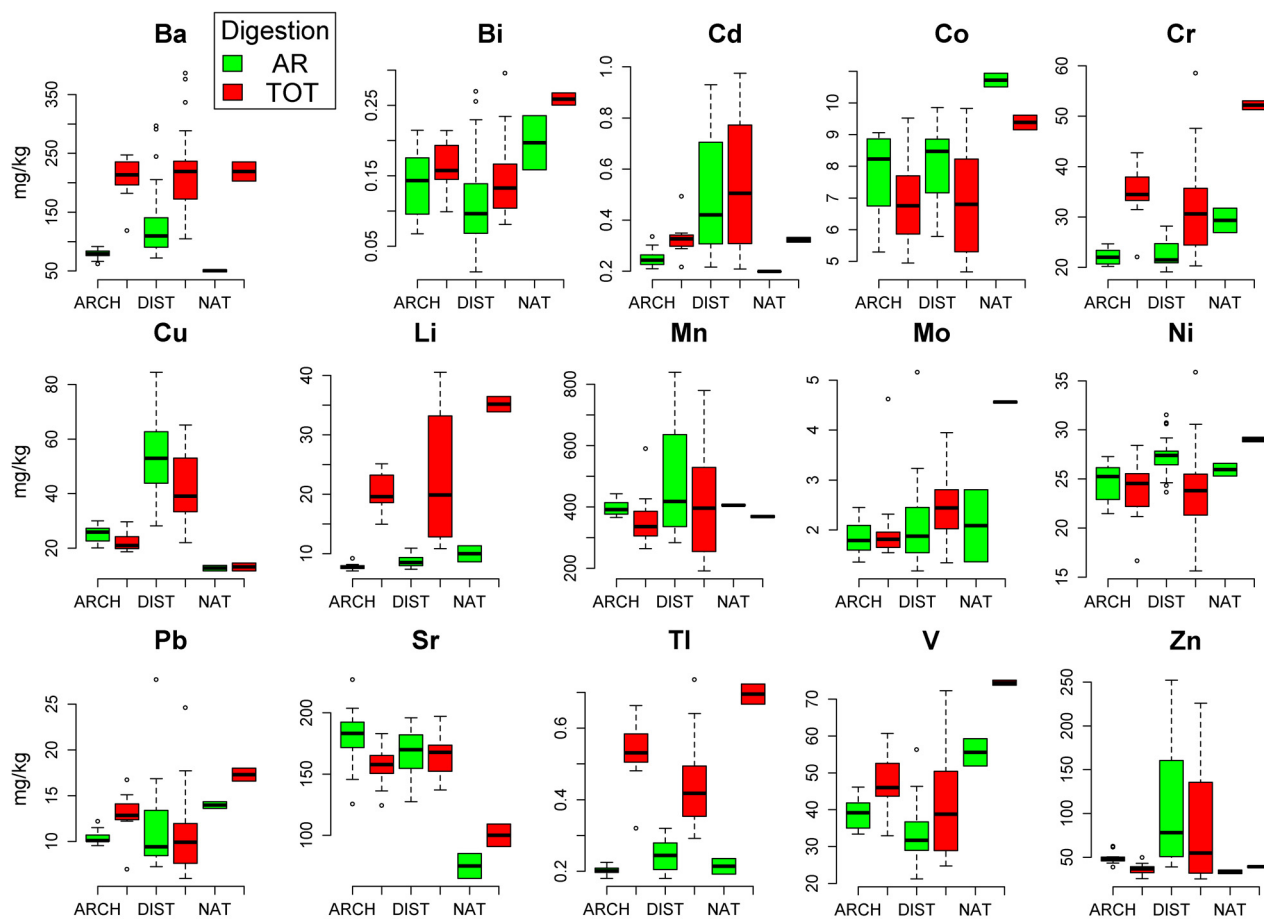

**Figure S4.** Boxplots for trace elements concentrations (AR: *aqua regia*; TOT: total digestion; ARCH: archaeological; DIST: disturbed; NAT: natural).

**Table S4.** REE concentrations expressed as mg kg<sup>-1</sup> and REE fractionation parameters obtained by *aqua regia* digestion.

| Sample   | Sc   | Y    | LREE | MREE  | HREE | Ce <sub>n</sub> /Ce* | Eu <sub>n</sub> /Eu* | La <sub>n</sub> /Yb <sub>n</sub> | La <sub>n</sub> /Sm <sub>n</sub> | Sm <sub>n</sub> /Yb <sub>n</sub> |
|----------|------|------|------|-------|------|----------------------|----------------------|----------------------------------|----------------------------------|----------------------------------|
| S4a1     | 3.49 | 7.47 | 51.6 | 6.38  | 1.35 | 0.95                 | 1.10                 | 1.72                             | 0.87                             | 1.99                             |
| S4a2     | 2.58 | 7.21 | 48.4 | 6.07  | 1.31 | 0.95                 | 1.11                 | 1.68                             | 0.87                             | 1.95                             |
| S4a3     | 3.06 | 6.92 | 45.3 | 5.77  | 1.26 | 0.95                 | 1.13                 | 1.64                             | 0.86                             | 1.92                             |
| S4a4     | 2.92 | 6.62 | 43.5 | 5.55  | 1.21 | 0.96                 | 1.15                 | 1.64                             | 0.85                             | 1.93                             |
| S4a5     | 3.28 | 7.22 | 49.2 | 6.20  | 1.36 | 0.96                 | 1.14                 | 1.63                             | 0.86                             | 1.90                             |
| S4a6     | 3.70 | 9.34 | 63.5 | 7.62  | 1.78 | 0.97                 | 1.08                 | 1.61                             | 0.90                             | 1.77                             |
| S4a7     | 3.90 | 10.2 | 70.5 | 8.35  | 1.93 | 0.97                 | 1.05                 | 1.62                             | 0.90                             | 1.79                             |
| S4a8     | 4.12 | 10.7 | 70.1 | 8.71  | 2.01 | 0.98                 | 1.09                 | 1.53                             | 0.87                             | 1.77                             |
| S4b1     | 3.45 | 7.59 | 48.5 | 6.29  | 1.37 | 0.95                 | 1.08                 | 1.60                             | 0.85                             | 1.89                             |
| S4b2     | 3.71 | 8.29 | 53.2 | 6.89  | 1.49 | 0.93                 | 1.08                 | 1.63                             | 0.85                             | 1.92                             |
| S4b3     | 3.89 | 8.11 | 53.4 | 6.72  | 1.44 | 0.96                 | 1.09                 | 1.71                             | 0.87                             | 1.96                             |
| S4b4     | 4.04 | 8.05 | 52.2 | 6.71  | 1.46 | 0.95                 | 1.10                 | 1.63                             | 0.86                             | 1.89                             |
| S4b5     | 3.55 | 7.23 | 48.0 | 6.13  | 1.33 | 0.95                 | 1.09                 | 1.62                             | 0.86                             | 1.88                             |
| S4b6     | 3.54 | 7.08 | 47.0 | 5.98  | 1.31 | 0.95                 | 1.09                 | 1.64                             | 0.86                             | 1.91                             |
| S4b7     | 3.52 | 7.11 | 46.5 | 5.96  | 1.31 | 0.93                 | 1.11                 | 1.63                             | 0.87                             | 1.87                             |
| S4b8     | 4.53 | 11.2 | 69.8 | 9.27  | 2.01 | 0.91                 | 1.09                 | 1.58                             | 0.82                             | 1.93                             |
| S4c1     | 5.64 | 12.9 | 95.1 | 11.5  | 2.31 | 1.01                 | 1.06                 | 1.80                             | 0.86                             | 2.10                             |
| S4c2     | 4.68 | 12.4 | 78.1 | 10.2  | 2.19 | 1.01                 | 1.10                 | 1.55                             | 0.82                             | 1.90                             |
| S4c3     | 4.27 | 10.3 | 68.7 | 8.88  | 1.88 | 0.98                 | 1.09                 | 1.58                             | 0.81                             | 1.96                             |
| S4c4     | 4.11 | 8.86 | 61.6 | 7.81  | 1.64 | 0.97                 | 1.06                 | 1.69                             | 0.85                             | 1.99                             |
| S4c5     | 4.07 | 9.18 | 62.3 | 7.93  | 1.70 | 0.98                 | 1.09                 | 1.62                             | 0.85                             | 1.91                             |
| S4c6     | 4.07 | 8.45 | 56.5 | 7.21  | 1.57 | 0.97                 | 1.09                 | 1.61                             | 0.86                             | 1.86                             |
| S4c7     | 4.02 | 8.61 | 59.8 | 7.46  | 1.56 | 0.97                 | 1.08                 | 1.72                             | 0.87                             | 1.97                             |
| S4c8     | 3.76 | 8.38 | 56.7 | 7.21  | 1.53 | 0.96                 | 1.09                 | 1.68                             | 0.87                             | 1.93                             |
| S4d1     | 3.93 | 9.21 | 65.1 | 7.87  | 1.62 | 0.95                 | 1.09                 | 1.84                             | 0.88                             | 2.08                             |
| S4d2     | 3.71 | 8.24 | 60.2 | 7.18  | 1.46 | 0.96                 | 1.08                 | 1.87                             | 0.89                             | 2.11                             |
| S4d3     | 3.81 | 8.61 | 63.1 | 7.54  | 1.54 | 0.96                 | 1.08                 | 1.84                             | 0.88                             | 2.08                             |
| S4d4     | 3.85 | 8.28 | 61.3 | 7.19  | 1.45 | 0.97                 | 1.06                 | 1.94                             | 0.91                             | 2.14                             |
| S4d5     | 3.80 | 8.63 | 63.0 | 7.54  | 1.54 | 0.97                 | 1.08                 | 1.86                             | 0.88                             | 2.11                             |
| S4d6     | 3.41 | 8.39 | 60.2 | 7.22  | 1.46 | 0.93                 | 1.08                 | 1.91                             | 0.91                             | 2.10                             |
| S4e1     | 5.26 | 11.9 | 93.2 | 10.71 | 2.09 | 1.03                 | 1.05                 | 1.93                             | 0.87                             | 2.22                             |
| S4e2     | 4.88 | 11.6 | 83.7 | 10.18 | 2.03 | 0.97                 | 1.08                 | 1.85                             | 0.84                             | 2.19                             |
| S4e3     | 3.97 | 10.4 | 71.0 | 8.86  | 1.85 | 0.99                 | 1.11                 | 1.67                             | 0.83                             | 2.01                             |
| S4e4     | 4.30 | 10.3 | 73.7 | 8.94  | 1.83 | 0.98                 | 1.09                 | 1.77                             | 0.85                             | 2.09                             |
| S4f1     | 4.55 | 11.3 | 81.1 | 9.90  | 2.02 | 0.97                 | 1.09                 | 1.80                             | 0.86                             | 2.10                             |
| S4f2     | 4.10 | 10.3 | 73.7 | 9.11  | 1.87 | 0.98                 | 1.11                 | 1.76                             | 0.85                             | 2.08                             |
| S4f3     | 4.13 | 10.1 | 72.5 | 8.99  | 1.89 | 0.98                 | 1.12                 | 1.70                             | 0.85                             | 2.01                             |
| S4f4     | 4.20 | 10.0 | 74.3 | 9.14  | 1.89 | 0.97                 | 1.11                 | 1.76                             | 0.85                             | 2.07                             |
| S4f5     | 3.61 | 9.58 | 70.3 | 8.51  | 1.78 | 0.99                 | 1.11                 | 1.75                             | 0.85                             | 2.07                             |
| Mean     | 3.9  | 9.1  | 63   | 7.8   | 1.7  | 0.97                 | 1.09                 | 1.71                             | 0.86                             | 1.98                             |
| St. Dev. | 0.6  | 1.6  | 13   | 1.5   | 0.3  | 0.02                 | 0.02                 | 0.11                             | 0.02                             | 0.11                             |

Note: LREE: sum of light REE (i.e., from La to Nd); MREE: sum of medium REE (i.e., from Sm to Ho); HREE: sum of heavy REE (i.e., from Er to Lu). n (subscript; e.g.: La<sub>n</sub>): element normalised by Post Archean Australian Shale (PAAS).

Ce\*: (La<sub>n</sub>/2) + (Pr<sub>n</sub>/2); Eu\*: (Sm<sub>n</sub>/2) + (Gd<sub>n</sub>/2). See also Gallelo et al. 2021. [14].

**Table S5.** REE concentrations expressed as mg kg<sup>-1</sup> and REE fractionation parameters obtained by total acid digestion.

| Sample   | Sc   | Y    | LREE  | MREE | HREE  | Ce <sub>n</sub> /Ce* | Eu <sub>n</sub> /Eu* | La <sub>n</sub> /Yb <sub>n</sub> | La <sub>n</sub> /Sm <sub>n</sub> | Sm <sub>n</sub> /Yb <sub>n</sub> |
|----------|------|------|-------|------|-------|----------------------|----------------------|----------------------------------|----------------------------------|----------------------------------|
| S4a1     | 3.30 | 5.84 | 49.2  | 5.21 | 1.15  | 0.84                 | 1.20                 | 2.29                             | 1.17                             | 1.95                             |
| S4a2     | 2.80 | 3.25 | 35.1  | 3.70 | 0.769 | 0.83                 | 1.16                 | 2.46                             | 1.16                             | 2.12                             |
| S4a3     | 3.94 | 5.43 | 56.9  | 7.40 | 1.57  | 0.96                 | 1.04                 | 1.60                             | 0.78                             | 2.04                             |
| S4a4     | 4.06 | 6.45 | 56.3  | 7.33 | 1.60  | 0.97                 | 1.04                 | 1.53                             | 0.79                             | 1.93                             |
| S4a5     | 3.86 | 6.15 | 55.4  | 7.19 | 1.61  | 0.99                 | 1.03                 | 1.48                             | 0.78                             | 1.89                             |
| S4a6     | 4.06 | 9.94 | 70.0  | 9.35 | 2.40  | 1.00                 | 0.99                 | 1.24                             | 0.79                             | 1.57                             |
| S4a7     | 6.06 | 9.11 | 70.6  | 9.15 | 2.13  | 1.02                 | 0.99                 | 1.40                             | 0.78                             | 1.79                             |
| S4a8     | 7.68 | 10.8 | 87.4  | 11.2 | 2.55  | 1.01                 | 0.95                 | 1.45                             | 0.80                             | 1.82                             |
| S4b1     | 5.10 | 4.52 | 57.4  | 7.92 | 1.74  | 0.95                 | 1.02                 | 1.45                             | 0.73                             | 1.97                             |
| S4b2     | 4.57 | 4.39 | 55.7  | 7.66 | 1.72  | 0.94                 | 1.02                 | 1.42                             | 0.74                             | 1.91                             |
| S4b3     | 4.22 | 5.01 | 59.5  | 8.21 | 1.81  | 0.94                 | 0.99                 | 1.42                             | 0.74                             | 1.92                             |
| S4b4     | 3.66 | 5.75 | 48.8  | 5.27 | 1.15  | 0.83                 | 1.17                 | 2.21                             | 1.13                             | 1.95                             |
| S4b5     | 4.53 | 5.08 | 63.5  | 8.72 | 1.90  | 0.95                 | 1.03                 | 1.47                             | 0.74                             | 1.98                             |
| S4b6     | 4.06 | 4.60 | 58.3  | 7.85 | 1.71  | 0.94                 | 1.02                 | 1.50                             | 0.75                             | 2.00                             |
| S4b7     | 4.08 | 4.50 | 59.1  | 7.98 | 1.75  | 0.94                 | 1.00                 | 1.48                             | 0.75                             | 1.98                             |
| S4b8     | 5.91 | 11.5 | 101.0 | 13.6 | 3.15  | 0.96                 | 1.01                 | 1.36                             | 0.77                             | 1.77                             |
| S4c1     | 6.91 | 13.3 | 127.3 | 16.3 | 3.56  | 0.99                 | 0.98                 | 1.54                             | 0.80                             | 1.93                             |
| S4c2     | 7.11 | 13.6 | 143.3 | 18.8 | 4.18  | 0.99                 | 1.01                 | 1.45                             | 0.77                             | 1.88                             |
| S4c3     | 5.44 | 9.11 | 121.9 | 17.0 | 3.78  | 0.98                 | 1.00                 | 1.38                             | 0.73                             | 1.88                             |
| S4c4     | 4.53 | 6.45 | 88.8  | 12.2 | 2.69  | 0.98                 | 0.99                 | 1.40                             | 0.73                             | 1.92                             |
| S4c5     | 5.65 | 7.21 | 87.6  | 12.1 | 2.75  | 1.00                 | 1.03                 | 1.32                             | 0.72                             | 1.83                             |
| S4c6     | 4.01 | 6.92 | 55.1  | 5.92 | 1.30  | 0.83                 | 1.18                 | 2.24                             | 1.17                             | 1.92                             |
| S4c7     | 5.73 | 5.27 | 71.2  | 9.98 | 2.20  | 0.96                 | 1.02                 | 1.39                             | 0.72                             | 1.93                             |
| S4c8     | 6.40 | 7.60 | 90.4  | 12.8 | 2.88  | 0.98                 | 1.03                 | 1.32                             | 0.72                             | 1.83                             |
| S4d1     | 5.17 | 7.86 | 91.0  | 12.8 | 2.90  | 0.98                 | 1.01                 | 1.32                             | 0.73                             | 1.82                             |
| S4d2     | 4.58 | 7.47 | 93.2  | 13.1 | 2.99  | 0.99                 | 1.00                 | 1.30                             | 0.72                             | 1.79                             |
| S4d3     | 4.99 | 7.26 | 92.2  | 13.3 | 3.07  | 0.98                 | 1.01                 | 1.26                             | 0.72                             | 1.76                             |
| S4d4     | 5.49 | 6.02 | 86.3  | 12.8 | 3.05  | 0.98                 | 1.00                 | 1.18                             | 0.70                             | 1.69                             |
| S4d5     | 4.69 | 3.75 | 67.0  | 9.72 | 2.25  | 0.97                 | 1.01                 | 1.29                             | 0.71                             | 1.81                             |
| S4d6     | 4.32 | 3.07 | 55.0  | 8.22 | 1.87  | 0.94                 | 1.03                 | 1.29                             | 0.69                             | 1.88                             |
| S4e1     | 7.84 | 11.7 | 122   | 17.0 | 3.99  | 0.99                 | 1.00                 | 1.28                             | 0.72                             | 1.77                             |
| S4e2     | 5.62 | 10.9 | 78.9  | 8.88 | 1.93  | 0.82                 | 1.17                 | 2.00                             | 1.04                             | 1.93                             |
| S4e3     | 7.99 | 9.40 | 93.9  | 12.9 | 3.03  | 1.00                 | 1.01                 | 1.30                             | 0.74                             | 1.77                             |
| S4e4     | 6.82 | 10.1 | 81.6  | 10.4 | 2.24  | 1.02                 | 1.01                 | 1.57                             | 0.81                             | 1.93                             |
| S4f1     | 7.28 | 12.3 | 97.6  | 12.7 | 2.81  | 1.00                 | 1.01                 | 1.49                             | 0.80                             | 1.86                             |
| S4f2     | 6.38 | 10.3 | 86.8  | 11.3 | 2.50  | 1.01                 | 1.01                 | 1.47                             | 0.78                             | 1.88                             |
| S4f3     | 5.72 | 9.47 | 78.4  | 10.2 | 2.27  | 1.01                 | 1.01                 | 1.45                             | 0.79                             | 1.85                             |
| S4f4     | 5.54 | 6.83 | 70.0  | 9.22 | 2.06  | 1.00                 | 1.02                 | 1.45                             | 0.79                             | 1.84                             |
| S4f5     | 6.16 | 10.4 | 87.3  | 11.2 | 2.58  | 1.00                 | 1.03                 | 1.44                             | 0.82                             | 1.77                             |
| Mean     | 5.3  | 8    | 78    | 10   | 2.3   | 0.96                 | 1.03                 | 1.51                             | 0.80                             | 1.87                             |
| St. Dev. | 1.3  | 3    | 24    | 3    | 0.8   | 0.06                 | 0.06                 | 0.30                             | 0.13                             | 0.10                             |

Note: LREE: sum of light REE (i.e., from La to Nd); MREE: sum of medium REE (i.e., from Sm to Ho); HREE: sum of heavy REE (i.e., from Er to Lu). n (subscript; e.g.: La<sub>n</sub>): element normalised by Post Archean Australian Shale (PAAS).

Ce\*: (La<sub>n</sub>/2) + (Pr<sub>n</sub>/2); Eu\*: (Sm<sub>n</sub>/2) + (Gd<sub>n</sub>/2). See also Gallelo et al. 2021. [14].
